# Supplementary material
Source: PubMed Central journal article supplement (PMC4378155)
Supplement: supp_pp.114.253328_253328Supplementary_Figure_S1.pdf [file supp_pp.114.253328_253328Supplementary_Figure_S1.pdf]

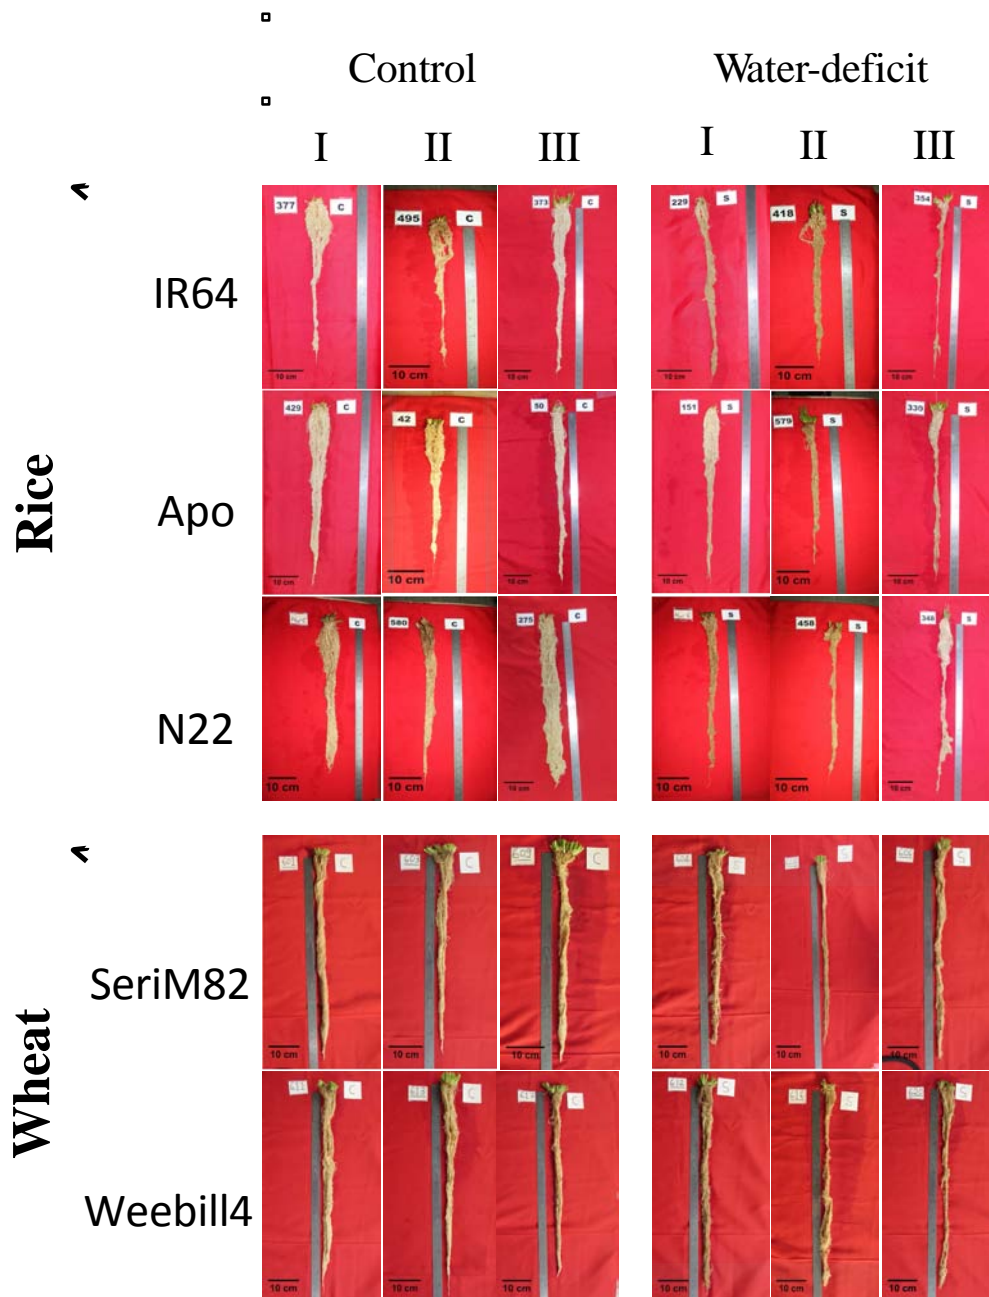

**Supplementary Figure S1:** Maximum root length (MRL) of rice (IR64, Apo, and N22) and wheat (SeriM82 and Weebill4) cultivars under control and water-deficit stress. Figure consists of replicated images (n=3). Scale bar on each image represents=10 cm.
