# Supplementary material
Source: PubMed Central journal article supplement (PMC4378155)
Supplement: supp_pp.114.253328_253328Supplementary_Figure_S2.pdf [file supp_pp.114.253328_253328Supplementary_Figure_S2.pdf]

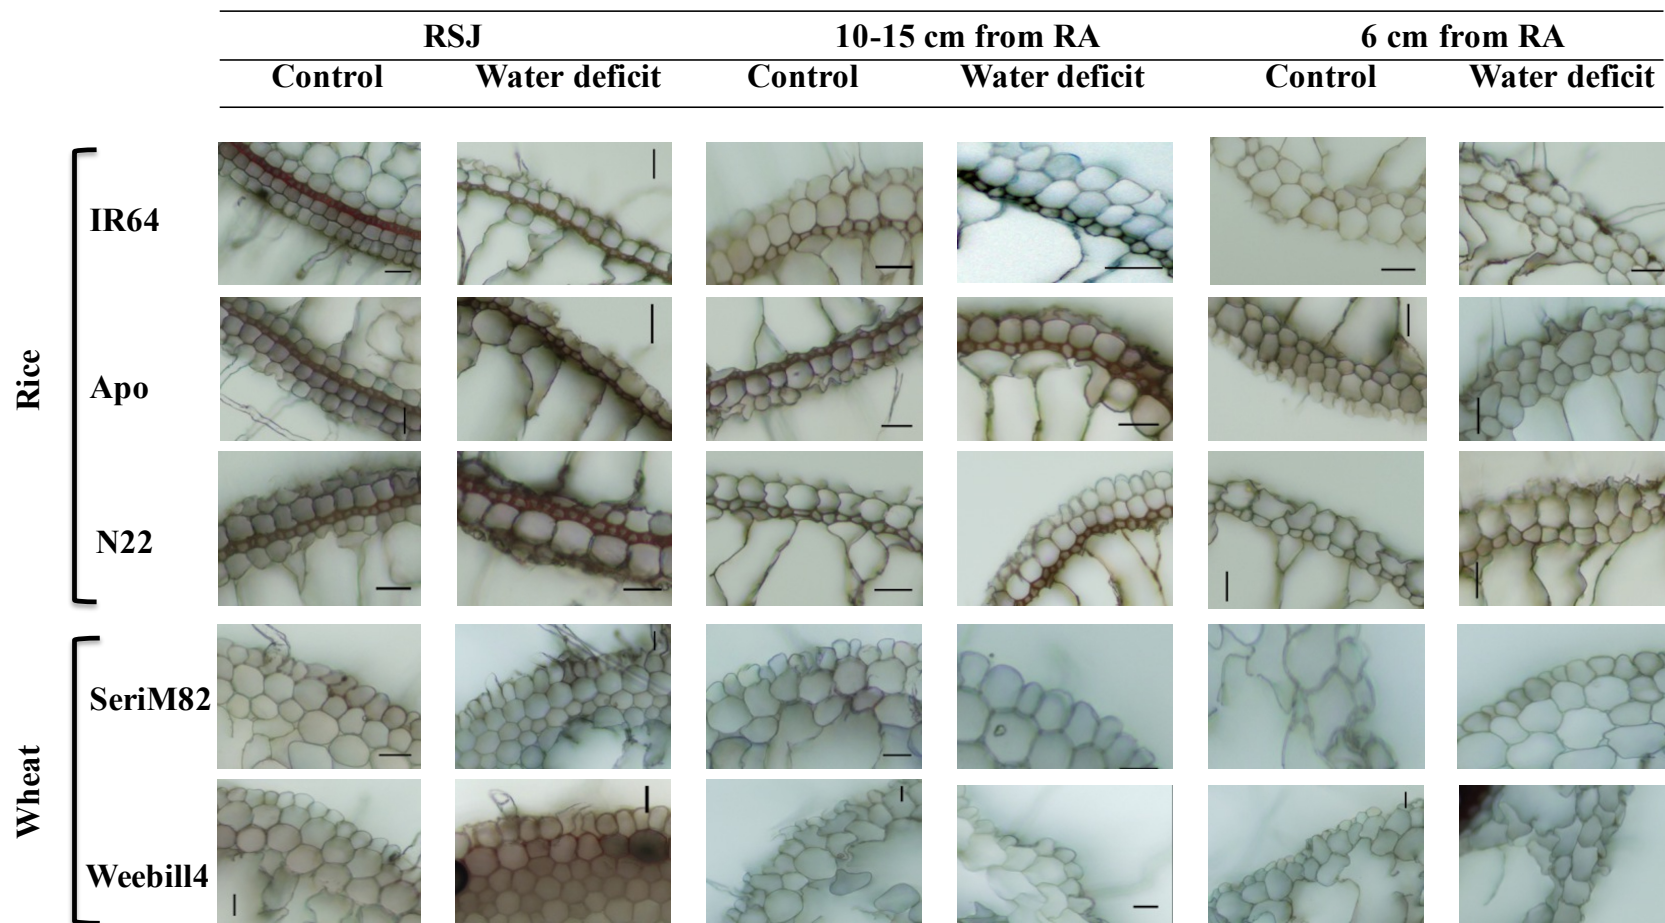

**Supplementary Figure S2:** Variation in sclerenchyma layer in different root zones of rice and wheat in control and water-deficit conditions. Scale bar on each image represents=30 $\mu$ m.
