# Supplementary material
Source: PubMed Central journal article supplement (PMC4378155)
Supplement: supp_pp.114.253328_253328Supplementary_Figure_S3.pdf [file supp_pp.114.253328_253328Supplementary_Figure_S3.pdf]

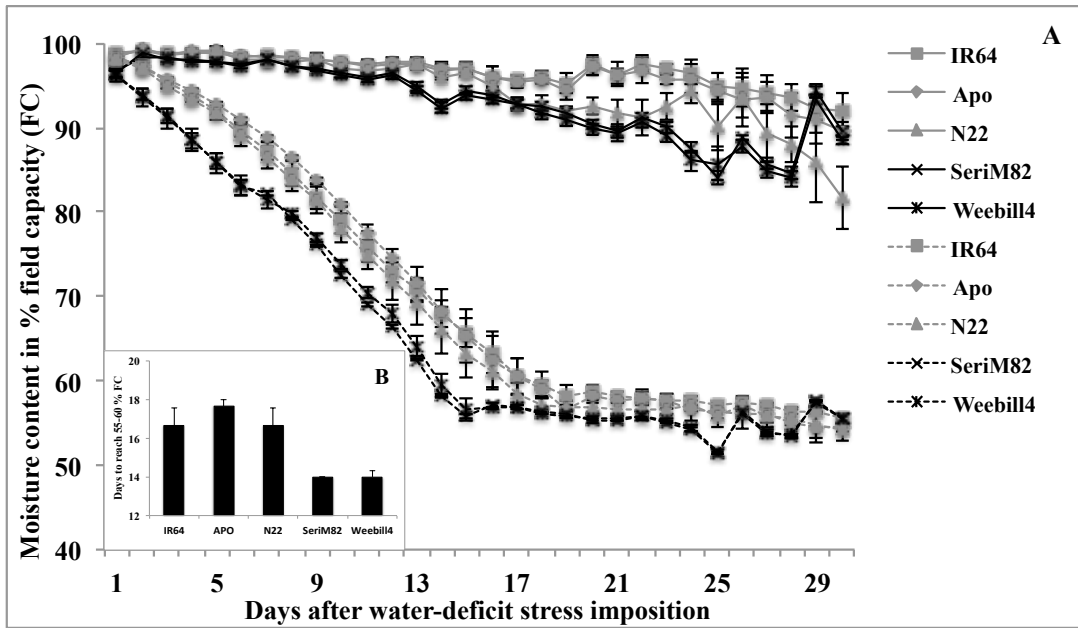

**Supplementary Figure S3:** rate of water depletion calculated based on pot weighing data for both rice (IR64, Apo, and N22) and wheat (SeriM82 and Weebill4) cultivars and expressed as moisture content in % field capacity (A). Number of days taken after stress imposition to reach the desired water-deficit stress expressed in % field capacity (FC) for both rice and wheat cultivars (B). Compared to rice, wheat cultivars reached the target-water-deficit stress (55-60 % FC) 3 days earlier but no cultivar differences were observed in either species.
