# Supplementary material
Source: PubMed Central journal article supplement (PMC4378155)
Supplement: supp_pp.114.253328_253328Supplementary_Table_S1.pdf [file supp_pp.114.253328_253328Supplementary_Table_S1.pdf]

**Supplementary Table S1:** Tiller number, total biomass, cumulative water transpiration, and biomass partitioning to various organs (leaf, stem, and root) of rice and wheat cultivars in control and water-deficit conditions. Values in table represent mean±SE and analysis of variance result with least significant difference (LSD) for each trait.

| Species                               | Cultivar             | Treatment     | TLA                  | TN                  | TB                   | CWT                  | LWR                 | SWR                 | RWR                 |
|---------------------------------------|----------------------|---------------|----------------------|---------------------|----------------------|----------------------|---------------------|---------------------|---------------------|
| Rice                                  | IR64                 | Control       | 1282±178             | 19.67±4.48          | 10.50±1.98           | 3.49±0.60            | 0.495±0.008         | 0.408±0.015         | 0.097±0.010         |
|                                       | IR64                 | Water-deficit | 855±149              | 18.67±1.45          | 8.36±1.06            | 2.15±0.35            | 0.416±0.012         | 0.505±0.010         | 0.079±0.002         |
|                                       | N22                  | Control       | 2544±347             | 21.00±2.52          | 23.78±2.83           | 6.35±0.92            | 0.431±0.027         | 0.473±0.023         | 0.096±0.012         |
|                                       | N22                  | Water-deficit | 1120±238             | 16.67±1.86          | 10.94±1.90           | 2.89±0.39            | 0.423±0.027         | 0.465±0.011         | 0.111±0.016         |
|                                       | APO                  | Control       | 1451±106             | 14.33±1.86          | 13.24±2.00           | 4.02±0.55            | 0.502±0.016         | 0.401±0.009         | 0.098±0.008         |
|                                       | APO                  | Water-deficit | 1007±188             | 13.33±1.20          | 10.02±1.44           | 2.65±0.47            | 0.481±0.017         | 0.433±0.012         | 0.085±0.007         |
| Wheat                                 | SeriM82              | Control       | 2005±254             | 34.67±2.19          | 18.45±1.41           | 6.94±0.36            | 0.488±0.048         | 0.364±0.033         | 0.147±0.016         |
|                                       | SeriM82              | Water-deficit | 1077±68              | 23.67±2.33          | 12.50±0.01           | 3.32±0.10            | 0.475±0.016         | 0.365±0.013         | 0.160±0.004         |
|                                       | Weebill4             | Control       | 2261±26              | 29.67±1.20          | 19.55±0.84           | 7.55±0.55            | 0.543±0.016         | 0.313±0.006         | 0.143±0.010         |
|                                       | Weebill4             | Water-deficit | 1085±121             | 18.33±2.40          | 12.03±1.04           | 3.30±0.26            | 0.499±0.008         | 0.347±0.006         | 0.155±0.014         |
| <b>LSD (<math>P &lt; 0.05</math>)</b> |                      |               |                      |                     |                      |                      |                     |                     |                     |
| Rice                                  | <b>Cultivar (C)</b>  |               | 297.0 <sup>***</sup> | 4.417 <sup>*</sup>  | 2.721 <sup>***</sup> | 0.838 <sup>**</sup>  | 0.031 <sup>**</sup> | 0.028 <sup>**</sup> | 0.018 <sup>ns</sup> |
|                                       | <b>Treatment (T)</b> |               | 242.5 <sup>***</sup> | 3.606 <sup>ns</sup> | 2.222 <sup>***</sup> | 0.684 <sup>***</sup> | 0.026 <sup>*</sup>  | 0.023 <sup>**</sup> | 0.015 <sup>ns</sup> |
|                                       | <b>C×T</b>           |               | 420.0 <sup>**</sup>  | 6.246 <sup>ns</sup> | 3.849 <sup>**</sup>  | 1.185 <sup>*</sup>   | 0.045 <sup>ns</sup> | 0.040 <sup>**</sup> | 0.026 <sup>ns</sup> |
| Wheat                                 | <b>Cultivar (C)</b>  |               | 380.1 <sup>ns</sup>  | 5.840 <sup>ns</sup> | 1.681 <sup>ns</sup>  | 0.690 <sup>ns</sup>  | 0.067 <sup>ns</sup> | 0.047 <sup>ns</sup> | 0.026 <sup>ns</sup> |
|                                       | <b>Treatment (T)</b> |               | 380.1 <sup>**</sup>  | 5.840 <sup>**</sup> | 1.681 <sup>***</sup> | 0.690 <sup>***</sup> | 0.067 <sup>ns</sup> | 0.047 <sup>ns</sup> | 0.026 <sup>ns</sup> |
|                                       | <b>C×T</b>           |               | 537.5 <sup>ns</sup>  | 8.260 <sup>ns</sup> | 2.377 <sup>ns</sup>  | 0.976 <sup>ns</sup>  | 0.095 <sup>ns</sup> | 0.067 <sup>ns</sup> | 0.036 <sup>ns</sup> |

TLA=total leaf area (cm<sup>2</sup> plant<sup>-1</sup>), TN=tiller number per plant, TB=total biomass (g plant<sup>-1</sup>), CWT=cumulative water transpiration (kg plant<sup>-1</sup>),  $\Delta^{13}\text{C}$ =carbon isotope discrimination, LWR=leaf weight ratio [g (leaf) g<sup>-1</sup> (plant)], SWR=stem weight ratio [g (stem) g<sup>-1</sup> (plant)], RWR=root weight ratio [g (root) g<sup>-1</sup> (plant)]. **Significance level:** \* $P < 0.05$ , \*\* $P < 0.01$ , \*\*\* $P < 0.001$ , ns=non-significant, SE=standard error.
