# Supplementary material
Source: PubMed Central journal article supplement (PMC4378155)
Supplement: supp_pp.114.253328_253328Supplementary_Table_S2.pdf [file supp_pp.114.253328_253328Supplementary_Table_S2.pdf]

**Supplementary Table S2:** Root morphological attributes of rice and wheat in control and water-deficit conditions. Values in table represent mean±SE and analysis of variance result with least significant difference (LSD) for each trait.

| Species                             | Cultivar | Treatment            | MRL                | TRL                  | RLD                  | RV                  | RB                  |
|-------------------------------------|----------|----------------------|--------------------|----------------------|----------------------|---------------------|---------------------|
| Rice                                | IR64     | Control              | 46.83±6.93         | 0.49±0.19            | 5.85±2.27            | 10.46±4.07          | 1.00±0.19           |
|                                     | IR64     | Water-deficit        | 51.72±6.83         | 0.46±0.06            | 5.48±0.69            | 7.51±0.38           | 0.66±0.10           |
|                                     | N22      | Control              | 53.3±1.21          | 0.97±0.31            | 11.7±3.78            | 22.94±5.37          | 2.35±0.53           |
|                                     | N22      | Water-deficit        | 55.03±3.49         | 0.57±0.22            | 6.83±2.70            | 11.98±3.01          | 1.24±0.31           |
|                                     | APO      | Control              | 52.6±5.83          | 0.49±0.10            | 5.95±1.20            | 15.47±2.48          | 1.31±0.23           |
|                                     | APO      | Water-deficit        | 51.73±2.61         | 0.42±0.11            | 5.12±1.36            | 8.64±1.88           | 0.85±0.14           |
| Wheat                               | SeriM82  | Control              | 55.67±3.18         | 1.26±0.14            | 15.11±1.63           | 37.41±4.37          | 2.72±0.38           |
|                                     | SeriM82  | Water-deficit        | 64.33±0.88         | 0.52±0.03            | 06.21±0.35           | 26.15±2.75          | 2.00±0.04           |
|                                     | Weebill4 | Control              | 61±2.08            | 1.12±0.05            | 13.52±0.62           | 33.35±2.55          | 2.81±0.32           |
|                                     | Weebill4 | Water-deficit        | 64±2.65            | 0.48±0.04            | 05.78±0.46           | 22.27±2.11          | 1.86±0.24           |
| <b>LSD (<math>P&lt;0.05</math>)</b> |          |                      |                    |                      |                      |                     |                     |
| Rice                                |          | <b>Cultivar (C)</b>  | 6.60 <sup>ns</sup> | 0.286 <sup>ns</sup>  | 3.440 <sup>ns</sup>  | 5.052 <sup>*</sup>  | 0.486 <sup>**</sup> |
|                                     |          | <b>Treatment (T)</b> | 5.39 <sup>ns</sup> | 0.233 <sup>ns</sup>  | 2.809 <sup>ns</sup>  | 4.125 <sup>**</sup> | 0.397 <sup>**</sup> |
|                                     |          | <b>C×T</b>           | 9.34 <sup>ns</sup> | 0.404 <sup>ns</sup>  | 4.865 <sup>ns</sup>  | 7.144 <sup>ns</sup> | 0.687 <sup>ns</sup> |
| Wheat                               |          | <b>Cultivar (C)</b>  | 5.12 <sup>ns</sup> | 0.172 <sup>ns</sup>  | 2.065 <sup>ns</sup>  | 5.550 <sup>ns</sup> | 0.472 <sup>ns</sup> |
|                                     |          | <b>Treatment (T)</b> | 5.12 <sup>*</sup>  | 0.172 <sup>***</sup> | 2.065 <sup>***</sup> | 5.550 <sup>**</sup> | 0.472 <sup>**</sup> |
|                                     |          | <b>C×T</b>           | 7.24 <sup>ns</sup> | 0.243 <sup>ns</sup>  | 2.920 <sup>ns</sup>  | 7.840 <sup>ns</sup> | 0.667 <sup>ns</sup> |

**MRL**=maximum root length (cm), **TRL**=total root length (km plant<sup>-1</sup>), **RLD**=root length density (cm cm<sup>3</sup>), **RV**=root volume (cm<sup>3</sup>), **RB**=root biomass (g plant<sup>-1</sup>). **Significance level:** \* $P<0.05$ , \*\* $P<0.01$ , \*\*\* $P<0.001$ , **ns**=non-significant, **SE**=standard error.
