# Supplementary material
Source: PubMed Central journal article supplement (PMC4378155)
Supplement: supp_pp.114.253328_253328Supplementary_Table_S3.pdf [file supp_pp.114.253328_253328Supplementary_Table_S3.pdf]

**Supplementary Table S3:** Analysis of variance results for nodal root anatomical traits in rice and wheat. Values in table represent least significant difference (LSD) for each trait.

| <b>Rice</b>                               | <b>RD</b>           | <b>SD</b>           | <b>LMXD</b>          | <b>LMXN</b>         | <b>SD:RD</b>        | <b>AC</b> |
|-------------------------------------------|---------------------|---------------------|----------------------|---------------------|---------------------|-----------|
| <b>Cultivar</b>                           | 108.3*              | 21.11***            | 4.239*               | 0.647*              | 1.262 <sup>ns</sup> | 0.0040**  |
| <b>Treatment</b>                          | 088.5**             | 17.24 <sup>ns</sup> | 3.461 <sup>ns</sup>  | 0.528*              | 1.030***            | 0.0033*   |
| <b>Tissue position</b>                    | 108.3***            | 21.11***            | 4.239 <sup>ns</sup>  | 0.647**             | 1.262 <sup>ns</sup> | 0.0040    |
| <b>Cultivar×Treatment</b>                 | 153.2 <sup>ns</sup> | 29.86 <sup>ns</sup> | 5.995 <sup>ns</sup>  | 0.914 <sup>ns</sup> | 1.785 <sup>ns</sup> | 0.0057    |
| <b>Cultivar×Tissue position</b>           | 187.6 <sup>ns</sup> | 36.57 <sup>ns</sup> | 7.342 <sup>ns</sup>  | 1.120 <sup>ns</sup> | 2.186 <sup>ns</sup> | 0.007     |
| <b>Treatment×Tissue position</b>          | 153.2 <sup>ns</sup> | 29.86 <sup>ns</sup> | 5.995 <sup>ns</sup>  | 0.914 <sup>ns</sup> | 1.785 <sup>ns</sup> | 0.0057*   |
| <b>Cultivar×Treatment×Tissue position</b> | 265.4 <sup>ns</sup> | 51.72 <sup>ns</sup> | 10.383 <sup>ns</sup> | 1.584 <sup>ns</sup> | 3.091 <sup>ns</sup> | 0.0099    |
| <b>Wheat</b>                              |                     |                     |                      |                     |                     |           |
| <b>Cultivar</b>                           | 066.5***            | 22.20***            | 8.92***              | 0.664 <sup>ns</sup> | 2.122 <sup>ns</sup> | 0.062***  |
| <b>Treatment</b>                          | 066.5 <sup>ns</sup> | 22.20 <sup>ns</sup> | 8.92 <sup>ns</sup>   | 0.664 <sup>ns</sup> | 2.122 <sup>ns</sup> | 0.062**   |
| <b>Tissue position</b>                    | 081.4***            | 27.18***            | 10.93***             | 0.814***            | 2.599***            | 0.0759*** |
| <b>Cultivar×Treatment</b>                 | 094.0 <sup>ns</sup> | 31.39 <sup>ns</sup> | 12.62 <sup>ns</sup>  | 0.940 <sup>ns</sup> | 3.001 <sup>ns</sup> | 0.0877*   |
| <b>Cultivar×Tissue position</b>           | 115.1 <sup>ns</sup> | 38.44 <sup>ns</sup> | 15.45*               | 1.151 <sup>ns</sup> | 3.675 <sup>ns</sup> | 0.0074**  |
| <b>Treatment×Tissue position</b>          | 115.1***            | 38.44***            | 15.45***             | 1.151***            | 3.675*              | 0.107***  |
| <b>Cultivar×Treatment×Tissue position</b> | 162.0 <sup>ns</sup> | 54.37 <sup>ns</sup> | 21.85 <sup>ns</sup>  | 1.627 <sup>ns</sup> | 5.197 <sup>ns</sup> | 0.152*    |

**RD**=root diameter ( $\mu\text{m}$ ), **SD**=stele diameter ( $\mu\text{m}$ ), **LMXD**=late metaxylem diameter ( $\mu\text{m}$ ), **LMXN**=late metaxylem number, **SD:RD**=stele diameter in proportion to root diameter (%), **AC**=axial conductance ( $\text{mg m MPa}^{-1} \text{s}^{-1}$ ). **Significance level:** \* $P < 0.05$ , \*\* $P < 0.01$ , \*\*\* $P < 0.001$ , **ns**= non-significant.
